# Supplementary material for: Non-equilibrium synthesis and characterization of n-type Bi2Te2.7Se0.3 thermoelectric material prepared by rapid laser melting and solidification
Source: Royal Society of Chemistry journal article supplement (doi:10.1039/c7ra02677c), 2017-01-01
Supplement: c7ra02677c1.pdf [file c7ra02677c1.pdf]

Journal Name

ARTICLE

## Electronic Supplementary Information

### Non-equilibrium synthesis and characterization of n-type $\text{Bi}_2\text{Te}_{2.7}\text{Se}_{0.3}$ thermoelectric material prepared by rapid laser melting and solidification

Yu Mao,<sup>a</sup> Yonggao Yan,<sup>\*a</sup> Keping Wu,<sup>a</sup> Hongyao Xie,<sup>a</sup> Zekun Xiu,<sup>a</sup> Jihui Yang,<sup>b</sup> Qingjie Zhang,<sup>a</sup> Ctirad Uher<sup>c</sup> and Xinfeng Tang<sup>\*a</sup>

<sup>a</sup> State Key Laboratory of Advanced Technology for Materials Synthesis and Processing, Wuhan University of Technology, Wuhan, Hubei 430070, China. E-mail: yanyonggao@whut.edu.cn; tangxf@whut.edu.cn

<sup>b</sup> Department of Materials Science and Engineering, University of Washington, Seattle, Washington 98195, USA

<sup>c</sup> Department of Physics, University of Michigan, Ann Arbor, Michigan 48109, USA

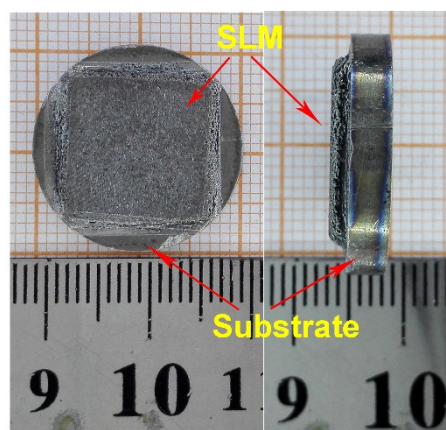

**Figure S1** Photos of the SLM-prepared bulk sample

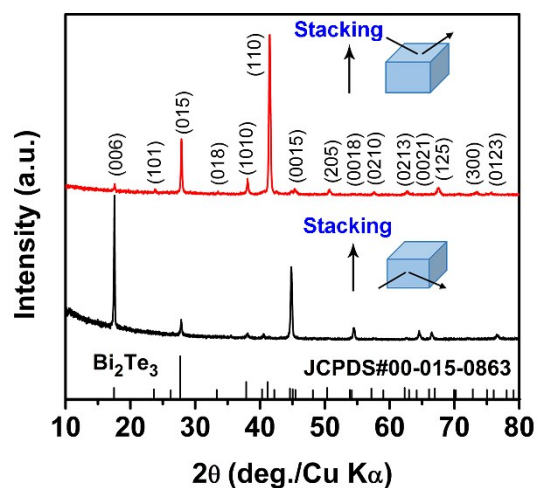

**Figure S2** XRD patterns of the SLM-prepared bulk sample collected on planes perpendicular and parallel to the stacking direction

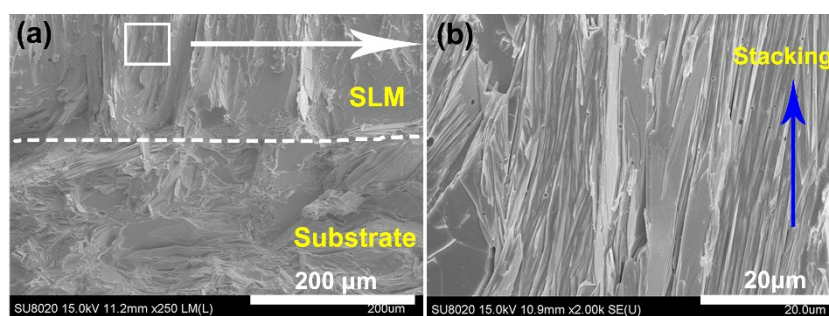

**Figure S3** SEM images showing the microstructure of the cross section of the SLM-prepared bulk sample: (a) SLM fabricated layers attached to an n-type  $\text{Bi}_2\text{Te}_{2.7}\text{Se}_{0.3}$  substrate; (b) enlarged area of (a) delineated by a white square showing aligned grains along the stacking direction
